# Supplementary material for: Two-tailed RT-qPCR: a novel method for highly accurate miRNA quantification
Source: PubMed Central journal article supplement — Nucleic Acids Res. 2017 Jul 13;45(15):e144. doi: 10.1093/nar/gkx588 (PMC5587787; doi:10.1093/nar/gkx588), 2017-07-13
Supplement: gkx588_supp.pdf [file gkx588_supp.pdf]

## SUPPLEMENTARY FILE

| 5' hemiprobe | Cq     | $\Delta$ Cq (relative to let-7a) |        |        |
|--------------|--------|----------------------------------|--------|--------|
|              | let-7a | let-7e                           | let-7f | let-7g |
| 10-mer       | 14.54  | 5.42                             | 4.61   | 9.17   |
| 8-mer        | 14.09  | 5.24                             | 5.30   | 9.78   |
| 7-mer        | 14.06  | 5.26                             | 5.89   | 10.14  |
| 6-mer        | 14.11  | 5.36                             | 6.06   | 10.44  |
| 5-mer        | 14.23  | 5.90                             | 6.93   | 11.03  |
| 4-mer        | 14.79  | 5.92                             | 6.48   | 10.58  |

**Figure S1. Effect of the 5'-hemiprobe length on specificity.** Two-tailed RT primers with 6 nt long 3'-hemiprobe and 5'-hemiprobe with variable length designed to target let-7a were assayed with four members of the let-7 family. Same PCR primers were used.

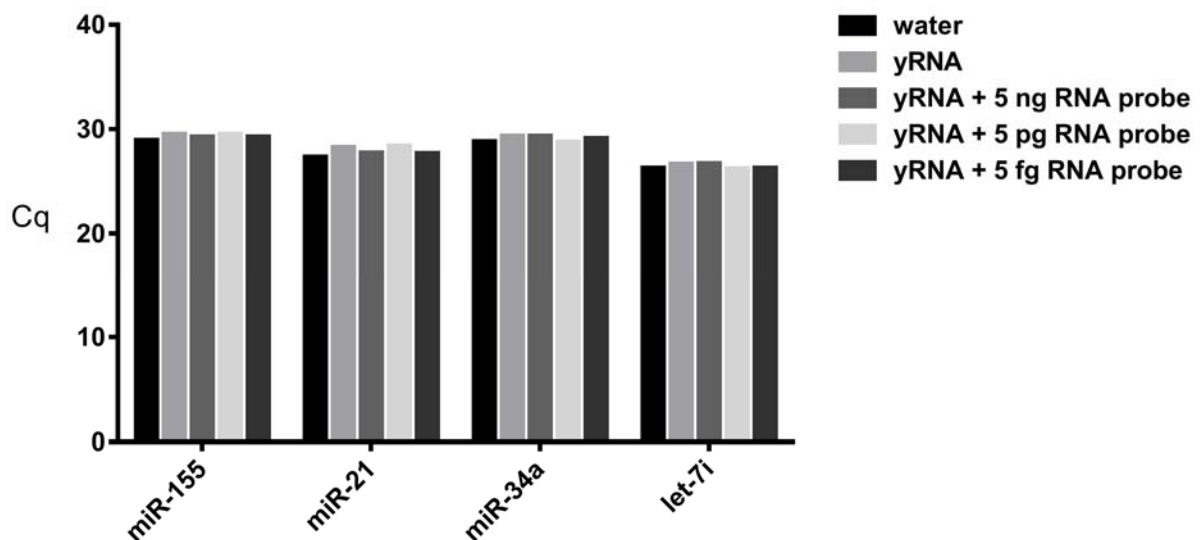

**Figure S2. Effect of complementary RNA background on sensitivity.** Hsa-miR-155 + hsa-miR-21 and hsa-miR-34a + hsa-let-7i ( $10^5$  copies/rxn) were mixed with either water, 10 ng yeast RNA, and 10 ng yeast RNA containing two mRNA probes at various concentrations. Target miRNAs were partially complementary to the mRNA probes (suppl. file). Mixtures were subjected to one freeze-thaw cycle to simulate sample storage conditions. Single RT reaction per sample was performed, since we have observed that technical variation is negligible (table 1). Presence of partially complementary long RNA in the background had no significant effect on Cq values.

## Primers and templates

| Legend              |        |
|---------------------|--------|
| binding hemiprobes: | blue   |
| primer arms:        | orange |
| stem:               | green  |
| loop:               | purple |

### Proof of concept experiment

| miRNA  | miRNA sequence (5' - 3') | RT primers                                                                                                          |    | qPCR primers             |
|--------|--------------------------|---------------------------------------------------------------------------------------------------------------------|----|--------------------------|
| let-7a | UGAGGUAGUAGGUUGUAUAGUU   | RT1: TACTACCTCACTATGCTCTCCAGGTACAGTTGGTACCTGTCTCCACTTAACTA<br>ATGATGGAGTCTATGCTCTCCAGGTACAGTTGGTACCTGTCTCCACTTAACTA | fw | ATGCTCTCCAGGTACAGTTG     |
| let-7f | UGAGGUAGUAGAUUGUAUAGUU   | CTATGCTCTCCAGGTACAGTTGGTACCTGTCTCCACTTAACTA<br>RT2: AACCTACTCTATGCTCTCCAGGTACAGTTGGTACCTGTCTCCACTTAACTA             | rv | GCCCATGAGGTAGTAGGTTGTATA |

### Cross-reactivity: mature isoforms

| miRNA  | miRNA sequence (5' - 3') | RT primer                                           |          | qPCR primers                                     |
|--------|--------------------------|-----------------------------------------------------|----------|--------------------------------------------------|
| let-7a | UGAGGUAGUAGGUUGUAUAGUU   | AACCTACTCTATGCTCTCCAGGTACAGTTGGTACCTGTCTCCACTTAACTA | fw<br>rv | CGAACCTACTCTATGCTCTCCAG<br>CGGGTAGGTTAGTAGGTTGTA |
| let-7b | UGAGGUAGUAGGUUGUGUGUU    | ACCTAACATGCTCTCCAGGTACAGTTGGTACCTGTCTCCACTTAACTA    | fw<br>rv | GCACCTAACATGCTCTCCAG<br>CGGTGAGGTAGTAGGTTGTA     |
| let-7c | UGAGGUAGUAGGUUGUAUUGUU   | ACCTAACATGCTCTCCAGGTACAGTTGGTACCTGTCTCCACTTAACTA    | fw<br>rv | GCACCTAACATGCTCTCCAG<br>CGGGTAGGTTAGTAGGTTGTA    |
| let-7d | AGAGGUAGUAGGUUGCAUAGUU   | CCTCTACATGCTCTCCAGGTACAGTTGGTACCTGTCTCCACTTAACTAT   | fw<br>rv | CGCCTCTACATGCTCTCCAG<br>CGCAGAGGTAGTAGGTTGC      |
| let-7e | UGAGGUAGGAGGUUGUAUAGUU   | CCTCCACATGCTCTCCAGGTACAGTTGGTACCTGTCTCCACTTAACTAT   | fw<br>rv | TCCTCCACATGCTCTCCAG<br>AGGGTAGGTTAGTAGGTTGTA     |
| let-7f | UGAGGUAGUAGAUUGUAUAGUU   | ATCTACACATGCTCTCCAGGTACAGTTGGTACCTGTCTCCACTTAACTAT  | fw<br>rv | CCATCTACACATGCTCTCCAG<br>GCCGTGAGGTAGTAGGTTGTA   |
| let-7g | UGAGGUAGUAGUUUGUACAGUU   | AACTACGCATGCTCTCCAGGTACAGTTGGTACCTGTCTCCACTTAACTGT  | fw<br>rv | AACTACGCATGCTCTCCAG<br>GCGGTGAGGTAGTAGGTTGTA     |
| let-7i | UGAGGUAGUAGUUUGUGCUUU    | AACTACGCATGCTCTCCAGGTACAGTTGGTACCTGTCTCCACTTAACTAGC | fw<br>rv | AACTACGCATGCTCTCCAG<br>GCGGTGAGGTAGTAGGTTGTA     |

### Cross-reactivity: precursors

| miRNA  | miRNA sequence (5' - 3') | RT primer                                           |          | qPCR primers                                     |
|--------|--------------------------|-----------------------------------------------------|----------|--------------------------------------------------|
| let-7a | UGAGGUAGUAGGUUGUAUAGUU   | AACCTACTCTATGCTCTCCAGGTACAGTTGGTACCTGTCTCCACTTAACTA | fw<br>rv | CGAACCTACTCTATGCTCTCCAG<br>ACCCTGAGGTAGTAGGTTGTA |
| let-7b | UGAGGUAGUAGGUUGUGUGUU    | ACCTAACATGCTCTCCAGGTACAGTTGGTACCTGTCTCCACTTAACTA    | fw<br>rv | GCACCTAACATGCTCTCCAG<br>ACCCTGAGGTAGTAGGTTGTA    |
| let-7f | UGAGGUAGUAGAUUGUAUAGUU   | ATCTACACATGCTCTCCAGGTACAGTTGGTACCTGTCTCCACTTAACTAT  | fw<br>rv | CCATCTACACATGCTCTCCAG<br>GCACCTGAGGTAGTAGGTTGTA  |

### MiRNA profiling in mouse tissues

| miRNA            | miRNA sequence (5' - 3') | RT primer                                           |          | qPCR primers                                      |
|------------------|--------------------------|-----------------------------------------------------|----------|---------------------------------------------------|
| mmu-miR-122-5p   | UGGAGUGUGACAAUGGUUUUG    | GTCACACTCAAGCTCTCCAGGTACAGTTGGTACCTGACTCCACGCCAAACA | fw<br>rv | GTCACACTCAAGCTCTCCAG<br>GGTGGAGTGTGACAATGGTG      |
| mmu-miR-30c-1-3p | CUGGGAGAGGGUUGUUUACUCC   | CCCTGTCGGATATGTGAGACGCTACGTTGATACCTCAAGTGAAGTGAGTAA | fw<br>rv | CCCTGTCGGATATGTGAGAC<br>GCTGGGAGAGGGTTGTTT        |
| mmu-miR-615-5p   | GGGGUCCCCGGUGUCGGAUC     | GACCCCGCTAGCTATGAGGTACAGTTGGTACCTGACTCTTGTGATCCG    | fw<br>rv | GACCCCGCTAGCTATGTC<br>GGGGTCCCCGGTGCT             |
| mmu-miR-193a-3p  | AACUGCCUACAAGUCCAGU      | TTGTAGGCCTTGAGTCTCGTAGAGTTGCTACGAGATATGATAAAGTGGG   | fw<br>rv | TTGTAGGCCTTGAGTCC<br>GGAACCTGGCTACAAGTCC          |
| mmu-miR-1a-3p    | UGGAAUUAAGAAGUAUUGUAU    | TTTACATTAGGGCACTGCTCTAGAGTTGCTAGGACTACGGACTTATACAT  | fw<br>rv | GGTTACATTAGGGCACTGCTC<br>CGGGTGAATGTAAAGAAGTATG   |
| mmu-miR-21a-5p   | UAGCUUAUCAGACUGAUGUUGA   | ATAAGCTACAACGACCAAGCTAGAGAACCTAGCTACCCACTACTCAACA   | fw<br>rv | CGCATAAGCTACAACGACCAAG<br>CGGGTAGCTTATCAGACTGATGT |
| mmu-miR-24-3p    | UGGCUAGUUCAGCAGGAACAG    | CTGAGCCAAGACGAATCTGCTAGAGTTGCTAGCAGAGCCCTTAACTGTTC  | fw<br>rv | CTGAGCCAGCAGCAATAC<br>GTGGCTCAGTTCAGCAGG          |



|        |                                                                                                 |
|--------|-------------------------------------------------------------------------------------------------|
| let-7c | <del>TGAGGTAGTAGGTTGTGTGGTTG</del><br><del>TAGTAGGTTGTATGGTTG</del><br>TGAGGTAGTAGGTTGTATGGTTGG |
| let-7d | AGAGGTAGTAGGTTGCATAGTTG                                                                         |
| let-7e | <del>TAGGAGGTTGTATAGTTG</del><br>TGAGGTAGGAGTTGTATAGTTGG                                        |
| let-7f | <del>AGTAGATTGTATAGTTGG</del><br>TGAGGTAGTAGATTGTATAGTTGGC                                      |
| let-7g | TGAGGTAGTAGTTTGTACAGTTG                                                                         |
| let-7i | TGAGGTAGTAGTTTGTGCTGTTG                                                                         |
| miR-21 | TAGCTTATCAGACTGATGTTGAGG                                                                        |

**Note:** Primers striken-through were taken from supplementary file 1 from Benes et al., 2015, *Scientific reports*, 5, 11590, but failed to amplify. They were then replaced with primers from supplementary file 2 from the same publication, which contained primers with optimized melting temperature.

#### Limit of Detection: Cq values

| miRNA target input in RT reaction | 1000  | 500   | 250   | 125   | 62.5  | 31.25 | 15.63 | 7.81  | 3.91  | no target control |
|-----------------------------------|-------|-------|-------|-------|-------|-------|-------|-------|-------|-------------------|
| Cq                                | 31.53 | 32.92 | 33.61 | 34.73 | 35.11 | 35.81 | n.d.  | 35.99 | n.d.  | n.d.              |
|                                   | 31.17 | 32.72 | 33.45 | 34.52 | 34.90 | n.d.  | n.d.  | n.d.  | n.d.  | n.d.              |
|                                   | 31.11 | 32.34 | 33.82 | 34.06 | 33.62 | 35.04 | n.d.  | 36.53 | n.d.  | n.d.              |
|                                   | 31.29 | 32.13 | 33.29 | 33.60 | 34.17 | 36.58 | 36.66 | n.d.  | 36.58 | n.d.              |
|                                   | 31.42 | 32.56 | 32.87 | 34.19 | 35.43 | 34.37 | n.d.  | n.d.  | n.d.  | n.d.              |
|                                   | 31.11 | 32.50 | 32.72 | 35.62 | 35.39 | 35.44 | 36.41 | 35.59 | n.d.  | n.d.              |

Cq values of a two-fold dilution series of a let-7d synthetic miRNA. cDNA was diluted 10 x in qPCR reactions.

#### MiRNA profiling in mouse tissues: Cq values and relative quantities

##### Two-tailed RT-qPCR: singleplex

Cq values

| Sample           | 122-5p | 193a-3p | 1a-3p | 21a-5p | 24-3p | 30c-1-3p | let-7a |
|------------------|--------|---------|-------|--------|-------|----------|--------|
| brain            | 26.52  | 30.83   | 30.66 | 26.66  | 21.13 | 30.54    | 22.08  |
| cereb.           | 28.02  | 30.57   | 29.67 | 25.85  | 20.81 | 29.00    | 20.33  |
| heart            | 28.79  | 30.67   | 21.23 | 25.01  | 20.18 | 29.22    | 21.97  |
| kidney           | 32.15  | 27.26   | 32.86 | 24.38  | 21.49 | 29.76    | 22.76  |
| liver            | 18.23  | 27.89   | 35.81 | 23.41  | 23.46 | 32.91    | 23.67  |
| lung             | 28.36  | 28.24   | 28.21 | 23.60  | 19.79 | 30.26    | 21.36  |
| muscle           | 23.33  | 27.47   | 20.19 | 25.95  | 21.75 | 31.62    | 23.27  |
| negative control | n.d.   | n.d.    | n.d.  | n.d.   | 36.91 | n.d.     | n.d.   |



Relative expression

| Sample | 122-5p | 193a-3p | 1a-3p | 21a-5p | 24-3p | 30c-1-3p | let-7a |
|--------|--------|---------|-------|--------|-------|----------|--------|
| brain  | 6.82   | 0       | 5.19  | 0      | 2.36  | 5.4      | 2.12   |
| cereb. | 5.1    | 0.52    | 5.63  | 0.78   | 2.63  | 6.15     | 3.42   |
| heart  | 4.21   | 0.47    | 14.45 | 1.56   | 3.32  | 5.29     | 1.71   |
| kidney | 0      | 3.77    | 2.86  | 2.17   | 1.89  | 5.39     | 1      |
| liver  | 14.93  | 3.21    | 0     | 3.25   | 0     | 0        | 0      |
| lung   | 4.8    | 2.98    | 7.55  | 3.16   | 3.65  | 6.66     | 2.1    |
| muscle | 9.79   | 3.38    | 15.68 | 0.6    | 1.78  | 3.67     | 0.53   |

Cq Values are presented as average of 2 qPCR replicates. Fold-changes were calculated relative to the sample with the lowest expression for a given miRNA. For the calculation, missing data were replaced with the max. Cq + 4, or with Cq 40 if a result was over 40.

**Hybridization experiment:**

Sequences of mRNA probes with highlighted complementary regions to spiked miRNAs are shown. Nucleotides in red are perfectly complementary between mRNA probe and miRNA target. Only sites with at least seven consecutive complementary nucleotides are shown.

>nNOS cds + miR-34a, let-7i

ATGGAAGAATATGAGTTCAGCGTTAAACAACCTGCAGCCGAATGTTATATCTGTGCGCCTCTTTAAGCGCA  
AAGTAGGAGGGCTGGGATTCCTGGCTAAGCAAAGGAGGAACAAACCACCTGTAATTATTTCTGATTTAAT  
TCGGGGAGGAGCAGCAGAACAGAGTGGGTTGGTGCAAGTAGGGGATATTATCTTAGCTGTGAATGATAGG  
CCCCTTGATAGATG**CCAGCTATGAAAGTGCC**CTGGAGATACTGCGTAGCATTTCCTCAGAGACTTTTGTTG  
TACTGATCCTTAGAGGTCCAGAAGGATTACAACCCACTTGGAGACCACCTTTTCTGGAGATGGAACACC  
CAAGACCATTTCGAGTCACCAGACCTCTTTGTTCTAAGTCCAAGTCAGCTGAATTGACAAGTCAGAGCCTT  
TATAGCAAAGATCACATGGTGGACAGTGCCACAAGTTCAGCTGGCTCTTCTTGGCAGGAGGTTTCATCAGC  
TTCTTAACTTGAATGGACTTGATGGTGGTAAAGGTGATGACATCAGCATCAGCCCTAGCCTTAACAGAGG  
AGAAAAGGCTAATGACATATTGAAAGAAATCGAGCCf<sub>oxa</sub>AATCGTTAGCCTTCTACAGAATGCAGGAAA  
CTAAATGGGGATGAACATCGAAATGTGGAGCAAAGGATGCGGAAGTTCAGGTTGAAAGCAACTCGCAGA  
CACAGCCGAGTATGAGAAGGACCAAGTCAATGGTATCTGGAAAAACAACAAGATGCCCGTGGTTTTT  
AAACAATCCATATCTGGAGTGTGAGCAGGTACATTAAGTGGTAGACATTCCCCTGCAAAGAGCCAAAGT  
AATGGAAGTCCATCCAAATGTCCTCGTTATTTGAAAATTGTAATTGGGATTCAAACACTACACTTAATG  
ACACCCTGCACAGCAAGGCTTCCATGCCAACACCCTGCACGCAACAGATATGCATGGGAGCCGTAATGAC  
ACCCCCACATTATGTTTCGCAAACCAGAGGACATTCGGACCAAAGAAGAGCTTCTTCCCCTTGCTAAGGAA  
TTTATTGACCAATATTTCTCATCAATTAAGGTTTTGGCTCTAAGGCACACATGGACAGACTACAAGAAG  
TGACAAAGGAGATTGAAGCCACAGATACCTATCAGCTACGGGATACAGAGCTTATTTACGGAGCCAAGCA  
TGCCTGGAGGAATGCATCCAGATGTGTGGGGAGAATCCAGTGGTCAAATTCAGTTATTTGATGCTCGA  
GACTGCACCCTGCTCATGGGATGTTCAATTACATTTGCAACCACATTAATATGCCACCAACAAAGGCA  
ACCTCAGATCAGCAATCACTATCTTCCCCAAAGAACGGATATGAAGCACGACTTTAGAATCTGGAATGC  
TCAGCTTATTCGCTATGCTGGATACAAACAGCCTGATGGTTCGGTGTGGGAGACCCTGCAAATGTAGAA  
TTGACAGAGATCTGCATTCAACAGGGCTGGAAGGCCCTCATG**GACGCTTTGATGTACTACCTCT**AATGC  
TCCAAGCAGATGGCAATGATCCTGAATTGTTTGGAGATCCCTCCTGAACTGATAATGGAAGTCAACATAAG  
GCATCCAAGACTAGAGTGGTTTTAAGGATCTGGGATTAAGTGGTATGGACTGCCTGCTGTATCCAATTG  
CTGCTGGAAATCGGAGGCTTGGAAATTCAGTGCCTGTCCCTCAGCGGATGGTACATGGGGACAGAAATG  
GTGTTCCGAGATTACTGTGACAACCTCCCGCTACAACATACTGGAGGAAGTGGCCTTAAAAATGAATCTGGA  
CACAAGGAAAACCTCCTCTCTGTGGAAGGATCAAGCTCTGGTGGAGATAAACATTGCTGTGTTGTACAGT  
TTCCAGAGCGATAAAGTAACAATCGTGGACCATCACTGTCTACTGAGTCTTTTCATCAAACATATGGAGA  
ATGAATACCGGTGCCGAGGAGGCTGCCAGCAGACTGGGTTTTGGATAGTGCCGCCGATGTCTGGAAGCAT  
TACACCTGTATTTACCAG**GAAATGTTAAACTACCGTCTTA**CACCTTCATTTGAGTACCAGCCGGATCCA  
TGAATACCCACGTATGGAAGGAGTTAATGGAACGCCAACAAAGAAAAGGGCCATTGGATTTAAAAAGC

TGGCAAAGGCAGTTAAATTTTCGGCTAAATTAATGGGACAGGCCATGGCTAAAAGAGTAAAGGCCACAAT  
TCTCTACGCAACAGAACTGGGAAATCACAAGTCTATGCAAAAACCTTTATGCGAAATCTTCAAGCATGCA  
TTTGATGCAAAGTTATGTCAATGGACGAATATGACGTTGTGCACCTGGAGCATGAAACACTTGTCTTAG  
TAGTGACAAGTACTTTTGGCAATGGTGATCCTCCAGAAAATGGAGAGAAGTTTGGCTGTGCATTAATGGA  
AATGAGACATCCCAACTCTAACTTGGAGGAGAGGAAAAGCTACAAAAGTCCGTTTTAATAGCGTCTCGTCC  
TCTGCTGATGCCAGAAATCATCTGCTAATGAGACGGGACCCAGAGACAACCTTTGGAAGTGCAAGTCCCC  
TAGCTAATGTTAGATTCTCAGCATTCCGACTGGGCTCCCGAGCTTATCCCCACTTCTGTGCCTTTGCCCG  
AGCGGTTGACACGTTGTTGGAGGAGCTTGGAGGAGAAAAGAATAATGAAAATGGGGGAAGGGGATGAACTG  
TGCGGACAAGAAGAATCATTTAGAACATGGGCCAAAAAAGTGTTCAGGCTGCATGTGACGTCTTTTGTG  
TAGGAGATGATTAAGTATTGAAAAAGCAAAACAACCTCACTGATTAGCAATGACCGCAGCTGGAAAAGAAG  
CAAGTACCGAATCAGCTTTGTGGCCGAGGCACCAAGACTTACACAAGCTTTATACAGTATTACAAGAAG  
AAAGTGTATGGAGCTCGTTTGTGTCTCGCCAGAACTTGCAAAAGCCAAAATCCAGCCGATCCACTATAT  
TCCTCAAACCTTCACTCTAATGGACATAAAGAAGCTGTGCTATAAACCTGGAGACCATTTAGGAGTCTTTCC  
TGGAAACCATGAAGATCTAGTGAATGCCTTGATAGAGCGATTAGACGATGCTCCTCCTGTGAACCAAATG  
GTGAGGGTGGAGATGCTGGAAGAAAAGAAATACCGCTTTAGGTGTGATCAGTAACTGGACAGAGGAGGAAC  
GAATTCCACCCTGCACCATTTTCCAAGCCTTTAAGTATTTCTAGATATTACAACGCCCCCTACCCCTCT  
CCTCATGCAGCAAATTCAGCTCCTGGCAACTGATGAGAAGGAAAAGAAACGACTGGAGATCCTAAGCAAG  
GGTTTGCAGGAATATGAGCAGTGGAAAGTGGTACAAGAATCCAACCTATTGTTGAGGTTCTAGAGGAGTTCC  
CTTCAATTCAGATGCCTTCATCCCTGCTGCTTACACAACCTACCCCTGCTACAACCAGTACTACTCCAT  
CAGCTCTTTCAGCTGAGATGTATCCAGAAGAAGTCCACCTTACTGTTGCTGTTGTGTCTTACCGCACAAGA  
GATGGAGATGGGCCTATACACCATGGTGTCTGCTCCTCATGGCTCAACAGAATACACCCAGATGAAGTTG  
TGCCCTGCTTTGTGAGAGGAGCTCCAAGTTTCAAATGCCGAAGACCCACAGGTCCCCTGCATTCTGAT  
AGGACCAGGCACTGGTATTGCTCCATTTAGGAGTTTTTGGCAGCAGCGTCTCTACGATA TGCAGCACAGA  
GGACTGAAACCCTTGTCCCATGATCTTGGTCTTTGGGTGTAGGGAATCCAAAATTGACCACATCTACAAAG  
AGGAAACAATGCATGCAAAGAACAAGGAGTGTTTAAAGAAGTCTTTCACAGCATATTCTCGGGAACCTAA  
TAAACCAAAGAAATATGTTCAAGATGTACTGAAGGAACAGTTATCTGAAGTACATACAAAGCTCTGAAG  
GATCAAGGGGGTACATATATATTTGTGGTGTGATGTCAACATGGCTGGGGATGTCTGAAGAGTCTTCAAC  
ATGTTGTGAAAGAGAGCGGAAATCTGACGATAGAAGAAGCTGGGGCCTTCATCAGCAAGCTAAGGGATGA  
CAATCGGTACCATGAAGATATTTTTGGAGTCACTCTTAGGACATATGAAGTTACAAATCGACTCAGATCT  
GAATCTATTGCATTATTGAGGAAAGCAAAAAGGACTCAGATGAGGTTTTCTGTCTATAA

>fos cds + miR-34a, let-7i

ATGTATCACGCCTTCTCAGCAACACTGACTACGATGCAGCTTCTTCCCGTTGCAGCAGTGCATCTCCAG  
CCGGGGACAGCCTGACCTACTACCCGTCCTCTGCAGCCTCCTTCTCTAGTATGGGGTCTCCTGTTTTACC  
ACAGGACTTTGGTGATTCAAGTAGCAGCTTTGTACCACAGTCACTGCCATTTCCACCTCTGCAGATCTT  
CAGTGGCTTGTGCAGCCAGCCCTTATTTCTTCTGTAGCCCCATCACAGTCTCGGGCACACCCATATGCGT  
CCACTCCAGTTTACAGTGCATCTGGTGTATGAAAGGATCTACTGGAAGAGGTGAGAGTCTGGGAAGAAG  
AGGAAAAATGGAGCAGCTTTCTCCAGAAGAAGAAGAAAAAAGAGAGTTAGACGGGAAAAGAAATAAGATG  
GCAGCAGCCAAGTGCCGCAACCGTCGCCGGGAGTTAACAGACACTCTTCAAGCGGAAACTGATGACCTGG  
AGGACCAGAAATCTGACCTGCAGGCAGAGATTGCCAGCCTTCTGAAGGAGAAGGAAAAGCTGGAGTTTAT  
ACTTGCAGCTCACAAAAGCTTGCAAAATTCACATGACCTTGAAGGAGCTTTTCAAGATTTGACCTCC  
TCTTTTGTATTTGGGTCTGATCTCTGAGACACCCTGTTCTTCCAGCTCTCAGGAGCCTGTAGCAGAGCCTT  
TGTTTTCCCTTTGGCCTTTCTCAGCCTTCCATCCCTGACAAGGAGAACACCCAGCTGCAAGTCTCTATGGA  
ACTCAAATCTGAACCACTGGATGATTTTTCTCTTTAACTCTCCTCATGCCGGTGTGGTGTATCTGATGCA  
GCACGCTCTGTGCCAGATGTAGATCTTACCAGCTCTCTGTACAATCAGAAATGGGAGCCACTCTATAGCA  
ATCTGTCTGTAGACATGGAGCCTTTGTGCACACCAGTTGTTACCTGCACTCCAACATGCACCTACCTATAC  
AACATCATTTGTCTTACATAACCCAGAATCTGACCCTTCCCCAACTGTGGAGCCGCACATCGGAGGGGA  
AGCAGCAGCAACGAGCAGTCACTAGACTCTCTAAACTCTCCCACCCTATTGGCACTGTAA

>foxile + miR-155, miR-21

GACATTAGCTAGTACAGGTGATTTTGTGACCTGCTAGCTTTTACTATGAGTGCATTTGATCCACAAGCAC  
ATTCTCCACCACGCTGTGGGCCACAATTTCCAGTATTGGGCAGGAGCCTCCAGAGATGAATATCTACTG  
TGAAAGCTTTTACATCCCCAGACAATGCCTAGTCTCAGCGACCTTCAAACCTTTGAAACAGGTGACTAC  
AGCACCCTGCAAATCCCTATCTGTGGTGAATGGACCTTCCATCACACCTCCTCCATATCTGCCAGGAT  
CCAACCTCAAGCCACTTCATGCCTCAGGCATATGGGATGCAGAGGCAGCTACTGCCTAACATGCATGGTTT  
GGGAAGTTCTGAATTAGGTTGGCTTCTTATTCCTTACAAGAAGAAGCTTATGAACTGGTGTGAGACCTCCA  
TACTCTTACTCTGCATTAATAGCAATGGCAATACATGGAGCCCAGATAAAAAGACTGACACTGAGCCAGA

TCTAC**CCAGTATGTTGCTGATAACTT**TCCTTTCTACAACAAGAGCAAAGCTGGGTGGCAGAATTCAATTCC  
ACACAACCTGTCTCTAAATGATTGCTTCAAGAAAGTACCAAGAGATGAAGATGATCCAGGCAAGGGCAAT  
TATTGGACCTTGGACCCAAACTGTGAAAAAATGTTTGACAACGGAACTTCCGCAGAAAGAG**GAAAAGAA**  
**AGTCTGATGTCAGC**CCCAATGGACAGTTATCTTCTGACAAGCCTGAAGGGAGCCCGCTAAGTGAGAGCCC  
TACGAATGGAGAGCATCAGGACATGTTGGGAAATTCTTACCAGGAACAGATGACTCCCCTGAAAAAAGG  
TCACCTCCTCCATCTATAACCCCATGCCTTAATAACTTTCTCTCCAGTATGACTGCATATGTTAATAGTG  
CTACCCCAATCAGTAGGTGAGTCCACTTGGACTCAG**TACGAAACCTCTGATAAGATG**GGACAGAACAT  
GGTTGGATTCAATTCCTACACTCCTCTTTCAAATATGCCAAGCCATGGAGGGTCTGACTGGTCATCTACC  
GTATCATCAAATCCTTTTGGCTACAGCAGTTCTGTGTTCAATCAATTCCTCCTCATTFTTTACAACAGTA  
TGAGTACAAACAATACTCTCTATAACAGAGAAGGTACAGAAGTATAACTGGGTGGTACCAATTTTATAGC  
AGTCACGACAAAGCTTCTTGGTGGCATATACATAGCATGCTTTTACTCTACAGAGTTCTCTTTATTCTTAT  
ACAACAGGCACCTGTCTGTGGTTATAAGTTTTAGTGAGTTGCTTCTACGGTGTTCAAAGCTTTTCTATC  
AAGGCAAATGATGCTTAGTGATGCATGGACTAATAGCAGGGAAGGGCACTGTATTAAGTAAGTCTTCAAT  
AAAATATGAAATGGCAAGCCTGCCAATTAGTGTTTTTGTAAAAAAAAGTAAAAGTTACTCAGAATTTGTT  
TTACTGACCTTTTTACTGTACCTTTCTGACGCACTACAGTGGTGAATACTGTATTTAGAGAAAAAAA  
AGAAAATTGCAAAGTAATGCTTTTCATACT**TCAAATATAACGTTTAGCATTG**GATTGTAATTTGGTCTGC  
TAACGTGTATTTATAAATGTTTACCTTGGATGTATAATATGTGGGGGGTAATGTGTTGGGTCTCAGACC  
TGTCTTCGGCTACTTACATGTTTTGTAAATGTTTAAATATTTTATATGTATTATAGCTAAATTCAGTGTGG  
GGTTTAAACATGGGTAATTTTATAATAAAAAAAAAAAAAAAAAA

>tuba4b + **miR-155**, **miR-21**

GCACAGGCTCCGGTGAGATTTCTCCCCTGGCTTTTCTCAAACGACCGACAGACCGTCATCCAAGACAGCA  
ATCATGAGGGAATGCATCTCAGTTCACGTGGGGCAGGCAGGAGTGCAGATGGGCAATGCATGCTGGGAGT  
TGTACTGCCTGGAACATGGGATCCAACCAGACGGTCAAGTGCACAAAACCATTGGTGGAGGAGA  
TGATTCATTTACCACATTCTTCAAGTGCAGGAGCTGGGAAGCATGTCCCCGTGCTGTGTTTGTGGAC  
CTGGAGCCAACCTGTGATTGATGAAGTGCAGGACAGGCATGTATCGGCAGCTGTTTCATCCAGAGCAACTTA  
TCAGTGGCAAAGAAGATGCAGCCAATAACTATGCCAGAGGACATTACACCATTGGCAAGGAAATCATTGA  
CCCAGTTCGGACAGAATACGTAAACTGGCTGATCAGTGCACAGGACTGCAGGGATTTTTAGTCTTCCAC  
AGTTTCCGGGGTGGCACTGGCTCTGGATTACCTCCCTGCTTATGGAACGTCTCTCTGTTGACTATGGCA  
AGAAGTCCAAGTTGGAATTCCTCATCTATCCTGCTCCTCAGGTTTCAACTGCTGTAGTGAACCCCTACAA  
CTCCATTCTTACCACTCACACAACACTTGAGCACTCAGACTGTGCATTATGGTGGACAATGAAGCCATT  
TATGACATCTGCAGAAGGAACCTGGACATTGAACGTCCAACCTACACCA**ACCTGAACCGTCTGATAAGCC**  
**AGATTGTGTCCTCTATCACTGCCTCTCTCAG**ATTTGATGGAGCTCTGAATGTGGACCTAACTGAATCCA  
AACTAACTTAGTACCCTACCCCGTATCCATTTCCCTCTGGCCACCTATGCCCTGTTATCTCTGCAGAG  
AAAGCTTATCATGAGCAACTCTCTGTATCTGAGATACCAATGCTTGCTTTGAGCCAGCCAATCAGATGG  
TGAAATGTGACCCCGACATGGTAAATACATGGCTTGTGGCTGCTATAACCGTGGTGTATGGTGGCCAA  
AGATGTCAATGCTGCTATTGCTGCCATCAAGACAAAACGCACCATCCAGTTTGTGATTGGTGGCCAACT  
GGATTCAAGGTTGGTATCAACTATCAACCCCAACAGCAGTTCCTGGTGGGGATCTGGCCAAAGTTCAGC  
GTGCTGTGTGCATGTTAAGTAACACCACCGCCATTGCTGAGGCCTGGGCTCGTCTGGATCACAAGTTTGA  
TCTCATGTATGCCAAGCGTGCCTTCGTGCACTGGTATGTAGGGGAGGGAATGGAGGAAGGGGAGTTCTCT  
GAGGCCCGTGAAGATATGGCTGCCCTGGAGAAGGATTATGAAGAGGTTGGAATTGACTCCTATGAAGATG  
AAGATGAAGGAGAGGAGTAATTATTTCTTCTTCCATCATCTTAATTGGAATATGCAAGATATTTTTTTT  
ACACTGCCCTCTCAACAGTAAAAACCAATGCTAGAAATGTATATCCTGCCAGCTTCTCCTGAATTTTA  
TTTTTAATGTGAATATCTTATTTGTAGCAGTTGAGGTTATTTTAGTGAAAAAATGTGCAAAATTTAAAA  
AAAAAAAAAAAA



**Cost estimate:**

|                            |                                                | <b>Two-tailed<br/>RT-qPCR</b> | <b>TaqMan</b> | <b>Quanta</b> | <b>miQPCR</b> |
|----------------------------|------------------------------------------------|-------------------------------|---------------|---------------|---------------|
| <b>Cost per:<br/>(USD)</b> | <b>Assay</b>                                   | 25.85                         | 254.27        | 11.97         | 11.97         |
|                            | <b>RT reagents/rxn</b>                         | 2.44                          | 0.74          | 4.82          | 7.25          |
|                            | <b>qPCR reagents/rxn</b>                       | 0.43                          | 0.91          | 0.43          | 0.43          |
|                            | <b>Assay + 20 RT and<br/>60 qPCR reactions</b> | 100.62                        | 323.81        | 134.21*       | 182.83**      |

Cost was estimated based on reaction volumes and reagents used as described in Materials and methods. Prices were taken from vendor/distributor websites as of June 2017, without VAT and special discounts. Prices for kits with comparable size were taken (usually 50 rxn/ RT kit, 500 rxn/PCR mastermix). Assay cost was calculated based on prices for custom oligonucleotides from Integrated DNA Technologies, except for TaqMan, where the sequences are proprietary and assays are sold commercially.

\* Cost of another widely used commercial method based on poly(A) tailing - miRCURY LNA™ microRNA qPCR system (Exiqon) is 354.7 USD (assay 152.1 USD, RT reagents/rxn 7.2 USD, qPCR reagents/rxn 1.0 USD)

\*\* miQPCR method requires additional initial purchase of pre-adenylated linker ( ~ 850 USD)
